# Supplementary material
Source: publisher figshare collection journal article supplement (https://karger.figshare.com/ndownloader/files/22539752)
Supplement: Supplementary file 1 [file 22539752]

## Sheet: Sheet1
TABLE S1 Primers for PCR amplification
	Genes	Strand	Primer sequence (5'-3')	Product size (bp)	Annealing temperature (°C)
	PD-1	Forward	ACGAGGGACAATAGGAGCCAG	187	67
		Reverse	GCCCATTCCGCTAGGAAAGAC
	PD-L1	Forward	ACTGGCATTTGCTGAACGCA	132	65
		Reverse	AGACAATTAGTGCAGCCAGGTCT
	CD8	Forward	CGGCCCTGAGCAACTCCATC	129	71
		Reverse	GGGACAGGGGCTGCGAC
	GAPDH	Forward	TTGGTATCGTGGAAGGACTC	131	60
		Reverse	AGTAGAGGCAGGGATGATGT
